# Supplementary material for: Structural uncertainty in air mass factor calculation for NO 2 and HCHO satellite retrievals
Source: Copernicus journal article supplement (doi:10.5194/amt-10-759-2017), 2017-03-07
Supplement: Supplementary file 1 [file amt-10-759-2017-supplement.pdf]

Supplement of Atmos. Meas. Tech., 10, 759–782, 2017  
<http://www.atmos-meas-tech.net/10/759/2017/>  
doi:10.5194/amt-10-759-2017-supplement  
© Author(s) 2017. CC Attribution 3.0 License.

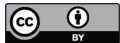

*Supplement of*

## **Structural uncertainty in air mass factor calculation for NO<sub>2</sub> and HCHO satellite retrievals**

**Alba Lorente et al.**

*Correspondence to:* Alba Lorente (alba.lorentedelgado@wur.nl)

The copyright of individual parts of the supplement might differ from the CC-BY 3.0 licence.

**Equation S1.** Effective temperature at which the cross sections should be fitted:

$$T_{eff} = \frac{\int_z^{\infty} T(z) \cdot m(z) \cdot n(z) dz}{\int_z^{\infty} m(z) \cdot n(z) dz} \quad (S1)$$

30 Where  $T(z)$  is the temperature profile,  $m(z)$  is the altitude-dependent air mass factor, and  $n(z)$  is the  $\text{NO}_2$  number-density profile.

**Equation S2.** Temperature correction factor from Boersma et al. (2002).

$$c_l = \frac{T_o - 11.4}{T_l - 11.4} \quad (S2)$$

$T_o$  : Cross section temperature used in the DOAS fit (220 K in this study).

35  $T_l$  : Temperature in layer l

**Equation S3.** Temperature correction factor from Bucsela et al. (2013).

$$c_l = 1 - 0.003 \cdot (T_l - T_o) \quad (S3)$$

$T_o$  : Cross section temperature used in the DOAS fit (220 K in this study).

$T_l$  : Temperature in layer l

40 **Equation S4.** Cloud radiance fraction (Boersma et al., 2004).

$$w = \frac{f_{cl} I_{cl}}{f_{cl} I_{cl} + (1 - f_{cl}) I_{cr}} \quad (S4)$$

$f_{cl}$  is the effective (i.e. radiometrically equivalent) cloud fraction, and  $I_{cr}$  and  $I_{cl}$  the fit-window averaged radiances for 100% clear and cloudy scenes, respectively.

45

50 **Table S1.** Model settings for top-of-the-atmosphere reflectance calculation with different RTMs, as described in Section 3.1.

| <b>Input Parameter</b>                             | <b>Number of reference points</b> | <b>Values of reference points</b>                                |
|----------------------------------------------------|-----------------------------------|------------------------------------------------------------------|
| Wavelength                                         | 7                                 | 340, 360, 380, 400, 420, 440, 460 nm                             |
| Atmospheric profile                                | N.A.                              | mid-latitude summer atmosphere including O <sub>3</sub> (335 DU) |
| $\mu_0$ (cosine solar zenith angle)                | 10                                | 1.00, 0.80, 0.60, 0.50, 0.30, 0.25, 0.15, 0.05, 0.03, 0.00       |
| Solar zenith angles                                | 10                                | 0°, 36.9°, 53.1°, 60°, 72.5°, 75.5°, 81.4°, 87.1°, 88.3°, 90°    |
| $\mu$ (cosine viewing zenith angle)                | 2                                 | 1.00, 0.30                                                       |
| Viewing zenith angles                              | 2                                 | 0°, 72.5°                                                        |
| $180- \varphi-\varphi_0 $ (relative azimuth angle) | 5                                 | 0°, 60°, 90°, 120°, 180°                                         |
| Surface albedo                                     | 1                                 | 0.00                                                             |
| Surface pressure                                   | 1                                 | 1013 hPa                                                         |

**Table S2.** Model settings for altitude dependent (box-) AMFs calculation in Section 3.2.

| <b>Input Parameter</b>              | <b>Number of reference points</b> | <b>Values of reference points</b>                                            |
|-------------------------------------|-----------------------------------|------------------------------------------------------------------------------|
| Atmospheric profile                 | N.A.                              | mid-latitude summer atmosphere including O <sub>3</sub> (335 DU)             |
| Layering                            | 170                               | 0, 0.1, 0.2, .... 10 km<br>10, 11, 12, .... 60 km<br>60, 62, 64, .... 100 km |
| $\mu_0$ (cosine solar zenith angle) | 12                                | 1.00, 0.90, 0.80, 0.70, 0.60, 0.50, 0.30, 0.25, 0.15, 0.05, 0.03, 0.00       |
| Solar zenith angle                  | 12                                | 0°, 25.8°, 36.9°, 45.6°, 53.1°, 60°, 72.5°, 75.5°, 81.4°, 87.1°, 88.3°, 90°  |

|                                                    |    |                                                                      |
|----------------------------------------------------|----|----------------------------------------------------------------------|
| $\mu$ (cosine viewing zenith angle)                | 6  | 1.00, 0.90, 0.80, 0.70, 0.50, 0.30                                   |
| Viewing zenith angle                               | 6  | 0°, 25.8°, 36.9°, 45.6°, 60°, 72.5°                                  |
| $180- \varphi-\varphi_0 $ (relative azimuth angle) | 13 | 0°, 15°, 30°, 45°, 60°, 75°, 90°, 105°, 120°, 135°, 150°, 165°, 180° |
| Surface albedo                                     | 7  | 0.00, 0.05, 0.1, 0.2, 0.5, 0.8, 1.0                                  |
| Surface height pressure (hPa)                      | 5  | 1013, 902, 802, 554, 281                                             |

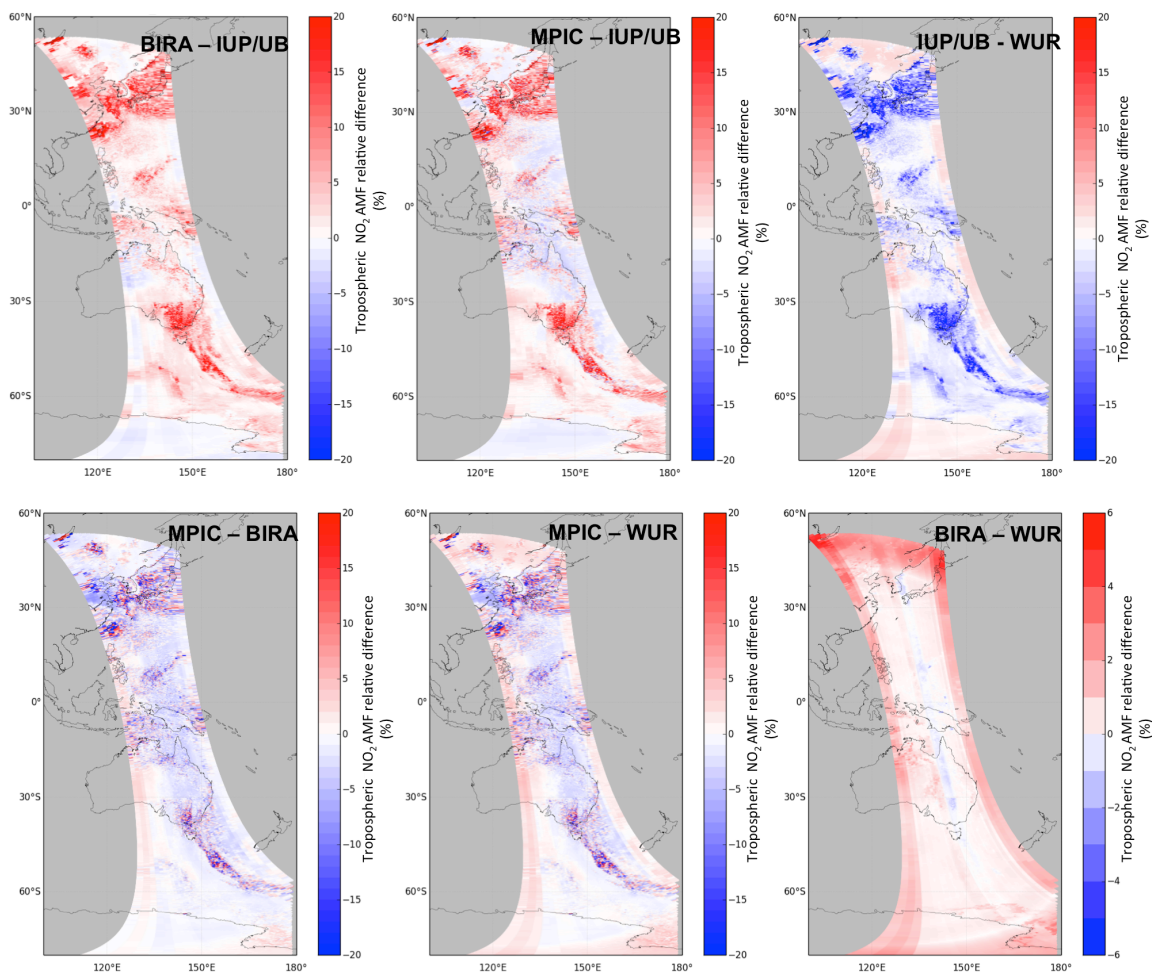

55

**Figure S1:** Relative differences of tropospheric NO<sub>2</sub> AMFs between each research group using harmonized settings. Only pixels with SZA < 70 ° are shown. The selected OMI orbit is from 02 February 2005 (2005m0202-o02940\_v003). Different scale was used for the differences between BIRA – WUR (lower right panel).

60

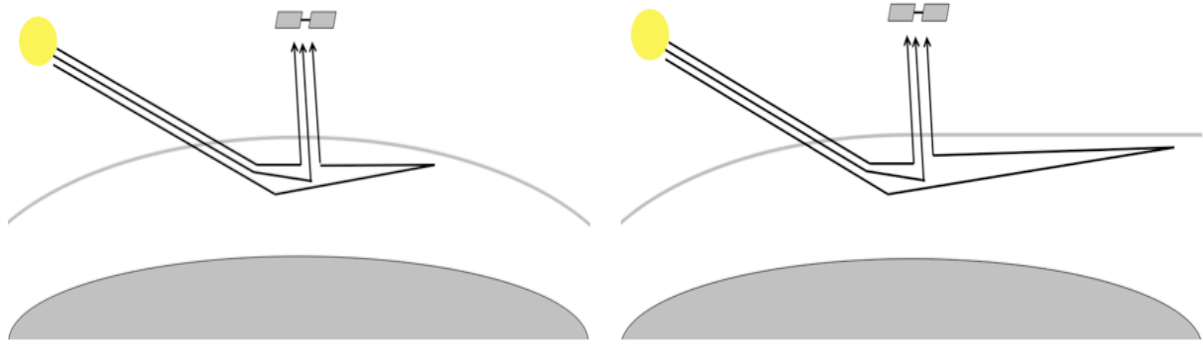

**Figure S2.** Schematic representation of differences in model design between McArtim (left) and DAK, VLIDORT and SCIATRAN (right) for the direct solar beam (left side of the individual figures) and the multiple scattered photons (left side of the individual figures). The grey line indicates the atmosphere's confinement (either spherical or plane parallel).

## **S1. Preferred settings for NO<sub>2</sub> tropospheric AMF calculation**

70 In this section we give a summary of the preferred settings for AMF calculation from the groups that do not have a published reference.

### **S1.1 BIRA – IASB**

For the radiative transfer modelling and box-AMF calculation, BIRA uses the VLIDORT radiative transfer model (see Sect. 2.2).

75 The surface reflectivity is a combination of the MODIS black sky albedo (BSA) gap filled product (MCD43GF) and the OMI minimum LER from Kleipool et al. (2008) at 440 nm. The MODIS BSA values are averaged over 10 years of measurements and the OMI min LER dataset is used to fill the gaps and for scenes over water.

Surface pressure is from the Global Multi-resolution Terrain Elevation Data 2010 with 30 x  
80 30 km resolution, corrected following the approach by Zhou et al. (2009).

The cloud parameters (cloud fraction and cloud pressure) are taken from the OMI 02-02 cloud retrieval (OMCLDO2, Acarreta et al., 2004).

For the cloud correction they apply IPA for cloud fractions higher than 0.2 and cloud masking for cloud fractions lower than 0.2. They apply an implicit aerosol correction.

85 The NO<sub>2</sub> a priori profiles are daily profiles from the TM5 chemistry transport model at a resolution of 1x1 degrees.

### **S1.2 IUP-UB**

For the radiative transfer modelling and box-AMF calculation, IUP-UB uses the SCIATRAN radiative transfer model (see Sect. 2.2).

90 Surface albedo is from Kleipool et al. (2008) updated dataset (version 3), which uses 5 years of OMI measurements. The monthly minimum LER at 442 nm is used.

Surface pressure is from the Global Multi-resolution Terrain Elevation Data 2010. They are gridded to 0.25 x 0.25 degrees and corrected following the approach by Zhou et al. (2009).

For the cloud correction they apply IPA for cloud fractions higher than 0.1 and cloud masking  
95 for cloud fractions lower than 0.1. They use modelled reflectances for the current albedo and

a cloud albedo of 0.8 to convert O2-O2 cloud fraction to radiance fraction. The cloud fraction threshold is cloud radiance fraction of 50%. They apply an implicit aerosol correction.

The NO<sub>2</sub> and temperature profiles come are daily MACC-II reanalysis profiles with a resolution of 1.25 x 1.25°

### 100 **S1.3 MPI-C**

For the radiative transfer modelling and box-AMF calculation, MPI-C uses the McArtim radiative transfer model (see Sect. 2.2).

Surface albedo is from Kleipool et al. (2008), version 002, which uses 3.5 years of OMI measurements. The monthly minimum LER at 440 nm is used.

105 Surface pressure is from TM4 chemistry transport model and corrected following the Zhou et al. (2009) approach using the high resolution DEM\_3km Earth Science Data type database.

The NO<sub>2</sub> and temperature profiles are daily TM4 model at a resolution of 3 x 2 degrees.

In the preferred settings, MPI-C accounts for the possibility of cloud aerosol mixtures or layer of other different types of aerosol. For this purpose they differentiate three different cases:

110 A. Clouds higher than 3 km. The independent pixel approximation is applied to calculate the AMF.

B. Low clouds and aerosols. For cloud altitudes below 2 km, a parameterized aerosol cloud layer is included between 0 and 1 km above the surface. This parameterization only represents a coarse cloud/aerosol model that assumes small cloud fractions to be pure aerosols and high cloud fractions to be pure clouds both with a fixed layer  
115 thickness of 1 km. They determine the relation between optical depth of an aerosol/cloud layer and the cloud radiance fraction using McArtim simulations. For this purpose they expand the LUT by the optical depth (OD), single scattering albedo and the Henyey Greenstein asymmetry parameter. Depending on the optical depth,  
120 they assume typical optical parameters of aerosols for OD ≤ 1, aerosols/cloud particle mixture for 1 < OD < 3 and cloud particles for OD > 3.

C. Low cloud fraction. For clouds between 2 and 3 km with cloud radiance fraction below 10%, they use the clear sky AMF.

125 D. High cloud fraction. For clouds between 2 and 3 km with cloud radiance fraction  
higher than 10%, they flag the pixel as invalid as it cannot be differentiate between  
white Lambertian clouds and mixtures of clouds and aerosols.

130

135



02 February 2005

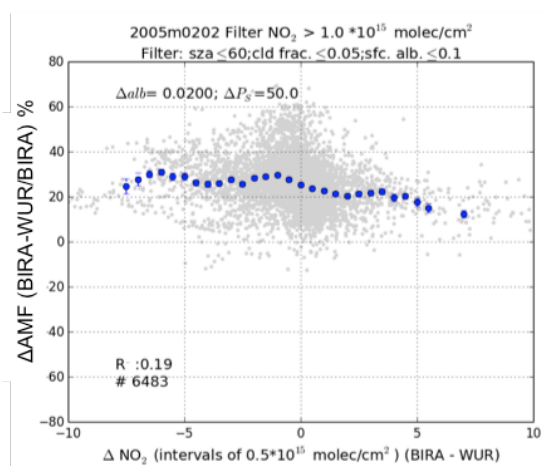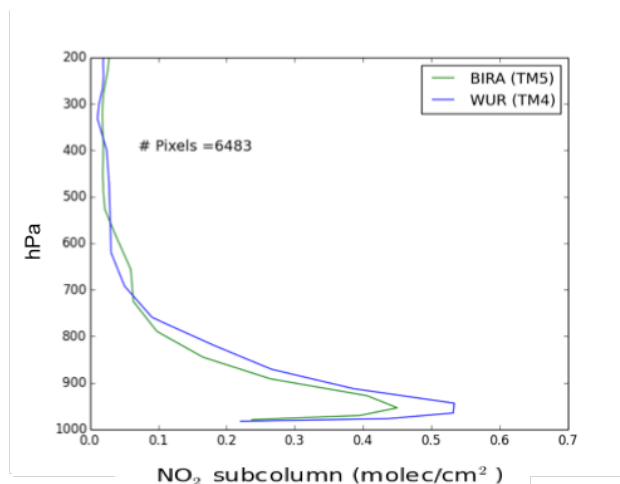

16 August 2005

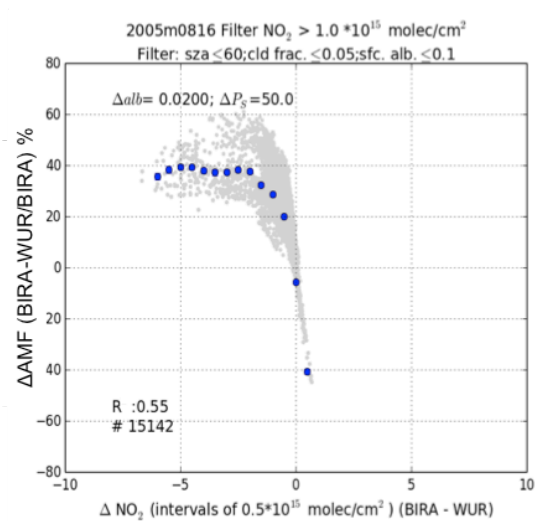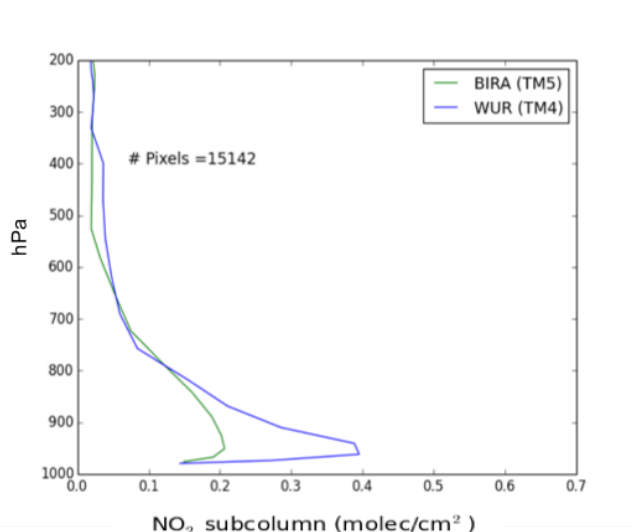

140

**Figure S3:** Example of correlation between AMF differences by BIRA and WUR ( $\Delta \text{AMF}$ ) and differences in  $\text{NO}_2$  vertical columns ( $\Delta \text{NO}_2$ ) for 02 February 2005 (upper panels) and 16 August 2005 (lower panels). The panels on the right show the average  $\text{NO}_2$  vertical profiles for the scenarios shown in the left panels (green, TM5 by BIRA and blue, TM4 by WUR).

145

|                  |                                          |                                   |                                   |
|------------------|------------------------------------------|-----------------------------------|-----------------------------------|
| <b>2005m0202</b> | $\Delta\text{AMF vs } \Delta\text{NO}_2$ | $\Delta\text{AMF vs } \Delta A_s$ | $\Delta\text{AMF vs } \Delta P_s$ |
| <b># Pixels</b>  | 6483                                     | 1876                              | 1303                              |
| <b>R</b>         | -0.19                                    | 0.50                              | -0.04                             |
| <b>2005m0816</b> | $\Delta\text{AMF vs } \Delta\text{NO}_2$ | $\Delta\text{AMF vs } \Delta A_s$ | $\Delta\text{AMF vs } \Delta P_s$ |
| <b># Pixels</b>  | 15142                                    | 5382                              | 2736                              |
| <b>R</b>         | -0.55                                    | 0.21                              | -0.01                             |

**Table S3:** Number (#) of pixels and correlation coefficient (R) for the correlation between air mass factor differences between WUR and BIRA ( $\Delta\text{AMF}$ ) with differences in modelled  $\text{NO}_2$  vertical column ( $\Delta\text{NO}_2$ ), surface albedo ( $\Delta A_s$ ) and surface pressure ( $\Delta P_s$ ) for 02 February 2005 and 16 August 2005. The first column corresponds to the correlation shown in left panels in Fig. S3.

160

165

170

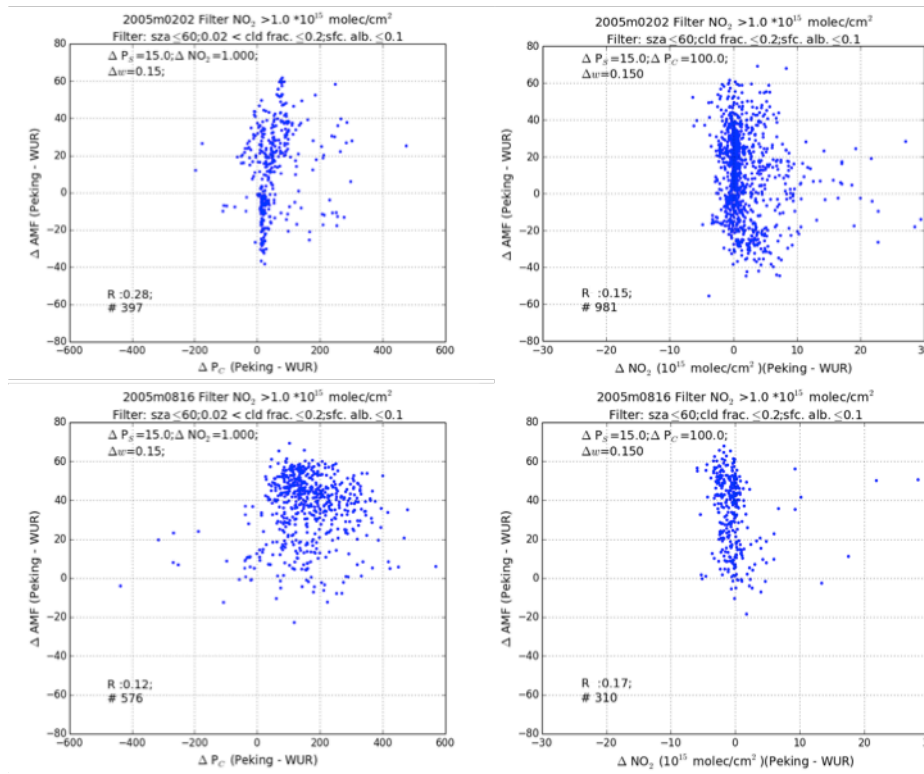

**Figure S4:** Correlation between AMF differences by Peking University and WUR ( $\Delta AMF$ ) and differences in cloud pressure ( $\Delta P_c$ ) and  $NO_2$  vertical columns ( $\Delta NO_2$ ) for the 02 February 175 2005 (upper panels) and 16 August 2005 (lower panels).

| <b>2005m0202</b> | $\Delta AMF$ vs $\Delta P_c$ | $\Delta AMF$ vs $\Delta NO_2$ |
|------------------|------------------------------|-------------------------------|
| <b># Pixels</b>  | 397                          | 981                           |
| <b>R</b>         | 0.28                         | 0.15                          |
| <b>2005m0816</b> | $\Delta AMF$ vs $\Delta P_c$ | $\Delta AMF$ vs $\Delta NO_2$ |
| <b># Pixels</b>  | 576                          | 310                           |
| <b>R</b>         | 0.12                         | 0.17                          |

**Table S4:**

180  
185  
Number (#) of pixels and correlation coefficient (R) for the correlation between air mass factor differences between Peking Uni. and WUR ( $\Delta AMF$ ) with differences in cloud pressure ( $\Delta P_c$ ) and modelled  $NO_2$  vertical column ( $\Delta NO_2$ ) and for the 02 February 2005 and 16 August 2005.

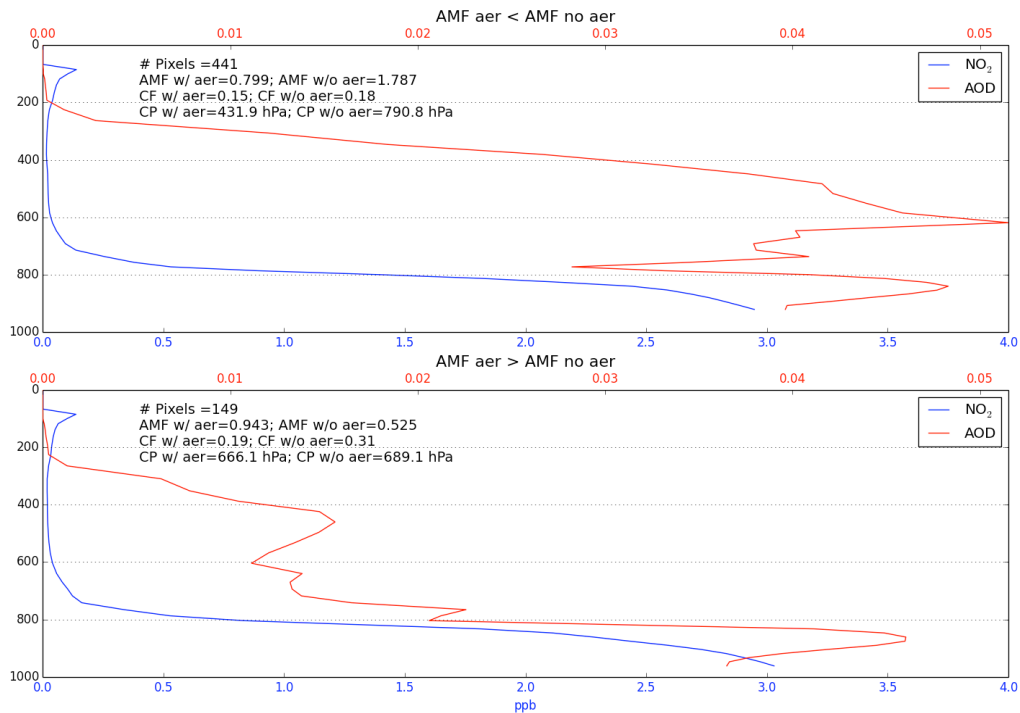

190

**Figure S5:** Aerosol optical depth (red line) and a priori NO<sub>2</sub> (blue line) vertical profiles for the 02 February 2005. Upper panel shows pixels where AMF<sub>aer</sub> (with explicit aerosol correction) are lower than AMF (without explicit aerosol correction), due to the screening effect of the aerosols layer above the NO<sub>2</sub> layer. Lower panel shows pixels where AMF<sub>aer</sub> (with explicit aerosol correction) are higher than AMF (without explicit aerosol correction), due to the increased scattering probability within the NO<sub>2</sub> + aerosol layer. Only pixels where AMF relative differences are higher than 25% are shown, as well as surface reflectance < 0.3, effective cloud fraction < 0.5 and AOD > 0.5.

200

|                       | $AMF_{aer} < AMF$         |                        | $AMF_{aer} > AMF$         |                        |
|-----------------------|---------------------------|------------------------|---------------------------|------------------------|
| <b># Pixels</b>       | 441                       |                        | 149                       |                        |
| <b>AOT</b>            | 1.1                       |                        | 0.7                       |                        |
| <b>SSA</b>            | 0.90                      |                        | 0.88                      |                        |
|                       | <b>Without correction</b> | <b>With correction</b> | <b>Without correction</b> | <b>With correction</b> |
| <b>Cloud fraction</b> | 0.18                      | 0.15                   | 0.31                      | 0.19                   |
| <b>Cloud Pressure</b> | 791 hPa                   | 432 hPa                | 689 hPa                   | 666 hPa                |
| <b>AMF</b>            | 1.78                      | 0.80                   | 0.53                      | 0.94                   |

**Table S5.** Tropospheric NO<sub>2</sub> AMFs calculated by Peking University with and without an explicit aerosol correction over China on the 02 February 2005. Pixels with AOT > 0.5, albedo < 0.3 and effective cloud fraction < 0.5 were selected. The average AOT and single scattering albedo originate from the GEOS-Chem aerosol simulations for the location and time of the pixels. The average cloud fraction and cloud pressure are the result from Peking University's cloud retrieval.

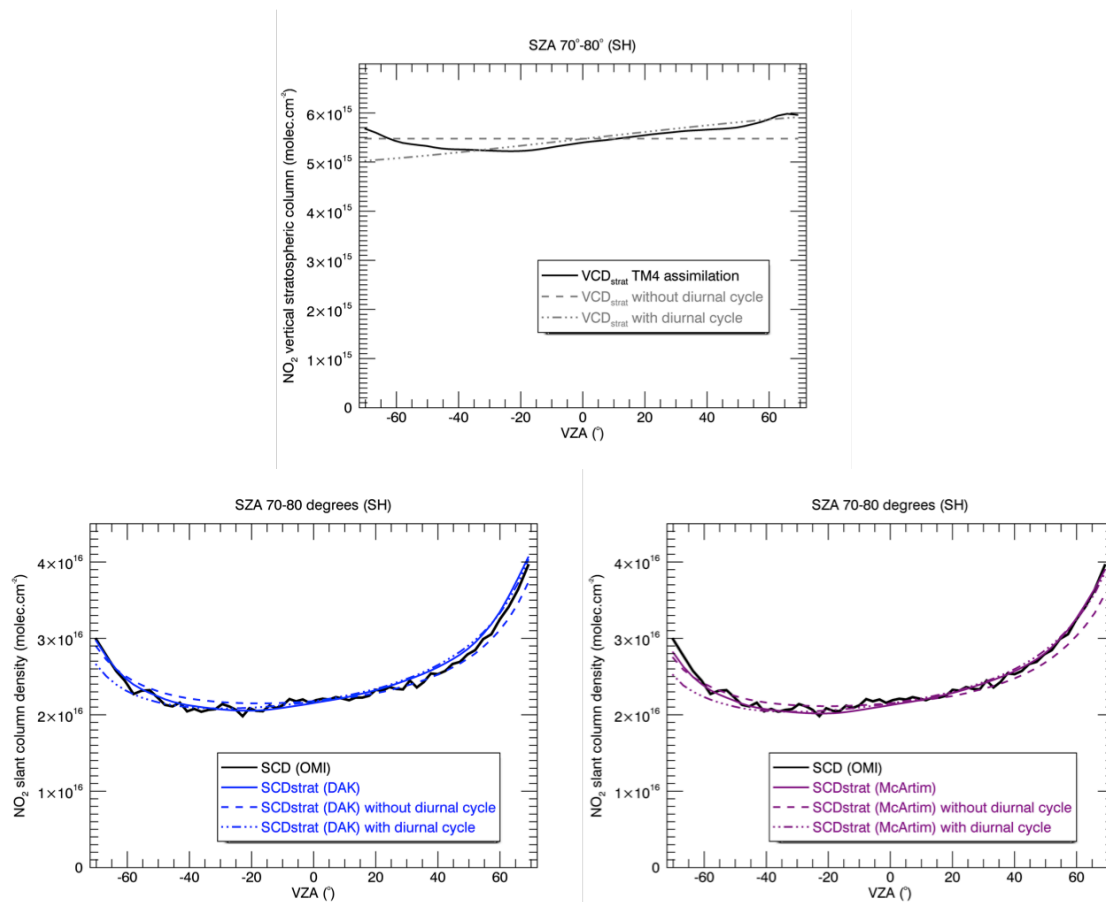

215

220

**Figure S6:** (Upper panel) Stratospheric vertical  $\text{NO}_2$  columns as a function of VZA from assimilation of OMI  $\text{NO}_2$  SCDs in TM4 (DOMINOV2 product). The dashed line indicates a scenario without any diurnal variation in stratospheric  $\text{NO}_2$  (local solar time differences are up to 6 hours at these latitudes), and dashed-dotted line indicates a scenario with a strong, consistent stratospheric  $\text{NO}_2$  increase rate (of  $0.15 \cdot 10^{15}$  molec/cm<sup>2</sup>/h). The lower panels compare the three corresponding simulated stratospheric slant columns (from TM4 assimilated VCD, without diurnal cycle and with diurnal cycle) from DAK (left panel) and McArtim (right panel) to the observed OMI total SCD (black solid line) as a function of OMI VZA.

225 **Table S6.** Statistical parameters of the comparison with the model mean  
 ((( $\overline{AMF} - AMF_x$ ) /  $\overline{AMF}$ ) \* 100, in %) of total tropospheric NO<sub>2</sub> AMFs calculated by each  
 group over the globe for polluted and unpolluted pixels (pixels with model NO<sub>2</sub> vertical  
 column higher or lower than 1•10<sup>15</sup> molec/cm<sup>2</sup> respectively). Upper panels correspond to  
 OMI measurements for the 02 February 2005 and the lower panels for the 16 August 2005.  
 230 Only pixels with cloud fraction ≤ 0.2 and SZA < 60° are considered in the comparison.

| Polluted pixels       |       |        |      |                |       |        | Unpolluted pixels |        |      |                |       |        |
|-----------------------|-------|--------|------|----------------|-------|--------|-------------------|--------|------|----------------|-------|--------|
|                       | Mean  | Median | σ    | R <sup>2</sup> | Slope | Offset | Mean              | Median | σ    | R <sup>2</sup> | Slope | Offset |
| <b>BIRA</b>           | -14.0 | -15.8  | 15.6 | 0.840          | 1.40  | -0.33  | -5.9              | -6.1   | 10.4 | 0.897          | 1.08  | -0.05  |
| <b>IUP-UB</b>         | 2.0   | 2.0    | 20.2 | 0.606          | 1.10  | -0.17  | 1.7               | 1.2    | 11.6 | 0.861          | 1.05  | -0.12  |
| <b>Leicester Uni.</b> | 3.7   | 3.8    | 14.6 | 0.788          | 1.07  | -0.14  | 7.4               | 7.7    | 8.4  | 0.926          | 1.04  | -0.2   |
| <b>MPIC</b>           | -8.0  | 7.1    | 42.1 | 0.699          | 2.60  | -1.85  | -2.6              | -2.4   | 17.9 | 0.827          | 1.45  | -0.75  |
| <b>NASA</b>           | -1.6  | -1.2   | 11.7 | 0.847          | 1.05  | -0.05  | -2.5              | -1.5   | 9.5  | 0.940          | 1.16  | -0.31  |
| <b>WUR</b>            | 18.0  | 18     | 12.5 | 0.814          | 1.06  | -0.30  | 1.8               | 1.5    | 8.8  | 0.938          | 1.13  | -0.26  |

  

| Polluted pixels       |      |        |      |                |       |        | Unpolluted pixels |        |      |                |       |        |
|-----------------------|------|--------|------|----------------|-------|--------|-------------------|--------|------|----------------|-------|--------|
|                       | Mean | Median | σ    | R <sup>2</sup> | Slope | Offset | Mean              | Median | σ    | R <sup>2</sup> | Slope | Offset |
| <b>BIRA</b>           | -9.7 | -13.2  | 15.5 | 0.916          | 1.39  | -0.36  | -5.2              | -5.9   | 9.3  | 0.929          | 1.1   | -0.09  |
| <b>IUP-UB</b>         | -7.3 | -6.2   | 15.3 | 0.859          | 1.04  | 0.02   | -0.8              | -0.7   | 11.3 | 0.875          | 1.01  | -0.01  |
| <b>Leicester Uni.</b> | 1.3  | 1.9    | 10.6 | 0.921          | 0.97  | 0.01   | 6.0               | 6.7    | 8.5  | 0.923          | 0.99  | -0.1   |
| <b>MPIC</b>           | 1.8  | 10.2   | 31.1 | 0.643          | 1.54  | -0.71  | -2.0              | -1.4   | 15.9 | 0.871          | 1.36  | -0.61  |
| <b>NASA</b>           | -1.7 | -1.5   | 11.5 | 0.918          | 1.08  | -0.08  | -1.6              | -0.9   | 9.6  | 0.915          | 1.03  | -0.03  |
| <b>WUR</b>            | 15.7 | 13.9   | 10.3 | 0.926          | 1.03  | -0.23  | 3.7               | 3.6    | 9.3  | 0.932          | 1.13  | -0.29  |

**Table S7.** Statistical parameters of the comparison with the model mean ( $((\overline{AMF} - AMF_x) / \overline{AMF}) * 100$ , in %) of total tropospheric NO<sub>2</sub> AMFs calculated by each group over China (20°-53°N / 80°-130°W) for polluted and unpolluted pixels (pixels with model NO<sub>2</sub> vertical column higher or lower than  $1 \cdot 10^{15}$  molec/cm<sup>2</sup> respectively). Upper panels correspond to OMI measurements for 02 February 2005 and the lower panels for 16 August 2005. Only pixels with cloud fraction  $\leq 0.2$  and SZA  $< 60^\circ$  are considered in the comparison.

|                       | Polluted pixels |        |          |                |       |        | Unpolluted pixels |        |          |                |       |        |
|-----------------------|-----------------|--------|----------|----------------|-------|--------|-------------------|--------|----------|----------------|-------|--------|
|                       | Mean            | Median | $\sigma$ | R <sup>2</sup> | Slope | Offset | Mean              | Median | $\sigma$ | R <sup>2</sup> | Slope | Offset |
| <b>BIRA</b>           | -10             | -7.5   | 18.2     | 0.769          | 1.42  | -0.37  | -15               | -15.1  | 15.2     | 0.860          | 1.27  | -0.18  |
| <b>IUP-UB</b>         | 5.1             | 9.0    | 14.9     | 0.728          | 0.70  | 0.27   | 8.3               | 12.6   | 16.2     | 0.745          | 1.08  | -0.24  |
| <b>Leicester Uni.</b> | -8.8            | -3.3   | 20.4     | 0.649          | 0.96  | 0.13   | 1.2               | 2.1    | 10.2     | 0.905          | 0.98  | 0.01   |
| <b>MPIC</b>           | 7.1             | 8.2    | 37.1     | 0.781          | 2.46  | -1.72  | -5.1              | -3.2   | 27.5     | 0.728          | 1.64  | -0.88  |
| <b>NASA</b>           | -0.2            | 1.5    | 11.9     | 0.843          | 0.94  | 0.06   | -2.5              | -2.9   | 11.4     | 0.910          | 1.13  | -0.15  |
| <b>Peking Uni.</b>    | -3.3            | -4.8   | 18.0     | 0.774          | 1.27  | -0.28  | 2.9               | 3.9    | 20.7     | 0.762          | 1.33  | -0.54  |
| <b>WUR</b>            | 10.7            | 9.9    | 13.0     | 0.880          | 1.22  | -0.37  | 10.1              | 10.2   | 12.3     | 0.882          | 1.11  | -0.31  |

  

|                       | Polluted pixels |        |          |                |       |        | Unpolluted pixels |        |          |                |       |        |
|-----------------------|-----------------|--------|----------|----------------|-------|--------|-------------------|--------|----------|----------------|-------|--------|
|                       | Mean            | Median | $\sigma$ | R <sup>2</sup> | Slope | Offset | Mean              | Median | $\sigma$ | R <sup>2</sup> | Slope | Offset |
| <b>BIRA</b>           | -10.5           | -10.9  | 13.4     | 0.855          | 1.41  | -0.33  | -10.3             | -10.2  | 8.6      | 0.960          | 1.27  | -0.26  |
| <b>IUP-UB</b>         | -20.0           | -20.8  | 14.0     | 0.767          | 1.13  | 0.06   | -0.9              | 0.1    | 9.6      | 0.899          | 0.87  | 0.20   |
| <b>Leicester Uni.</b> | 7.2             | 8.1    | 9.7      | 0.871          | 1.06  | -0.14  | 8.0               | 7.6    | 7.8      | 0.931          | 0.97  | -0.09  |
| <b>MPIC</b>           | 26.0            | 27.0   | 12.7     | 0.708          | 1.06  | -0.34  | -1.0              | -0.9   | 10.6     | 0.929          | 1.27  | -0.40  |
| <b>NASA</b>           | -0.9            | 0.7    | 17       | 0.778          | 1.43  | -0.46  | 4.7               | 4.3    | 11.2     | 0.874          | 1.05  | -0.16  |
| <b>Peking Uni.</b>    | -24.6           | -25.3  | 20.0     | 0.775          | 1.81  | -0.60  | -3.2              | -0.9   | 15.3     | 0.822          | 1.18  | -0.24  |
| <b>WUR</b>            | 22.8            | 23.3   | 12.5     | 0.701          | 1.04  | -0.29  | 2.8               | 3.3    | 8.6      | 0.934          | 1.10  | -0.19  |
